# Supplementary material for: The T6SS effector Tldi1 enhances Salmonella enterica serovar Typhimurium virulence by regulating motility and stress adaptation
Source: Research Square preprint supplement (doi:10.21203/rs.3.rs-8390046/v1), 2026-02-03
Supplement: Supplementary file 1 [file 5d127fca59e331f5b3dfa0d3.docx]

Table S2: Bacterial strains and plasmids used in this study.

| Strain or plasmid | Description | source |
| --- | --- | --- |
| SL1344 | Salmonella enterica serovar Enteritidis 1,4,5,12:i:1,2 | Our laboratory |
| SM10 | Constructing a vector for gene complementation strains; AmpR | Our laboratory |
| ΔTldi1 | Salmonella enterica serovar Enteritidis1,4,5,12:i:1,2ΔTldi1 | this study |
| pDM4 | Suicide plasmid; CmR | Our laboratory |
| pBR322 | Constructing cloning vectors for ΔDUF2195/pΔDUF2195; AmpR | Our laboratory |
