# Supplementary material for: The T6SS effector Tldi1 enhances Salmonella enterica serovar Typhimurium virulence by regulating motility and stress adaptation
Source: Research Square preprint supplement (doi:10.21203/rs.3.rs-8390046/v1), 2026-02-03
Supplement: Supplementary file 2 [file 69a4f106c15bf4e7440745b6.docx]

Table S3: Bioinformatics software and web sites

| Software | web sites | Function prediction |
| --- | --- | --- |
| Protparam | https://web.expasy.org/protparam/ | Physicochemical properties of protein |
| ProtScale | https://web.expasy.org/protscale/ | Hydrophilicity/Hydrophobicity Analysis |
| TMHMM 2.0 | https://services.healthtech.dtu.dk/services/DeepTMHMM-1.0/ | Transmembrane Domain Prediction |
| SignalP5.0 | https://services.healthtech.dtu.dk/services/SignalP-6.0/ | Prediction of Signal Peptides |
