# Supplementary material for: The T6SS effector Tldi1 enhances Salmonella enterica serovar Typhimurium virulence by regulating motility and stress adaptation
Source: Research Square preprint supplement (doi:10.21203/rs.3.rs-8390046/v1), 2026-02-03
Supplement: Supplementary file 3 [file c8161ecea3e31090a6d231b5.docx]

Table S1: The primer sequences used to generate and confirm SL1344ΔTldi1 mutant strains

| Prime | Sequence（5'-3'） | Source |
| --- | --- | --- |
| Tldi1-Up-F | GCTTATCGATACCGTCGACCCTCG ATGACCGGAGTGCTGATGGC | This study |
| Tldi1-Up-R | TTCTGTGTACAGCATCTGACCTCTATTTTTTTC |
| Tldi1-Down-F | CAGATGCTGTACACAGAATAGTCAGGGAGAAGA |
| Tldi1-Down-R | CACTAGTGACGCGTACTCGATAAC CGTAAATGTCTTTTCACCA |
| Tldi1-D-F | CCACACCCGTCCTGTGGATCCGTGAAAAAGTACGCTGTAGAGGTTCT |
| Tldi1-D-R | TGCGTCCGGCGTAGAGGATCCTTACAGCGGTGGTGTACAACGT |
| Tldi1-F | CTGGGGCGGAACAGATGTAA |
| Tldi1-R | TCAACATCCTGCGCCAGTAA |
| InvA-F | CAGGATACCTATAGTGCTGC |
| InvA-R | CGCACCGTCAAAGGAACCGT |
| IL-12-F | TGGTTTGCCATCGTTTTGCTG | (Li et al., 2024) |
| IL-12-R | ACAGGTGAGGTTCACTGTTTCT |
| IL-15-F | ATGTTCATCAACACGTCCTGACT |
| IL-15-R | GCAGCAGGTGGAGGTACCTTAA |
| IL-18-F | AAATGGAGACCTGGAATCAGAC | This study |
| IL-18-R | TTTGTCAACGAAGAGAACTTGG |
| ZO-1-F | GCTTTAGCGAACAGAAGGAGC |
| ZO-1-R | TTCATTTTTCCGAGACTTCACCA |
| Occludin-1-F | TGAAAGTCCACCTCCTTACAGA |
| Occludin-1-R | CCGGATAAAAAGAGTACGCTGG |
| Claudin-1-F | TGCCCCAGTGGAAGATTTACT |
| Claudin-1-R | CTTTGCGAAACGCAGGACAT |
| β-action-F | CCACGAAACTACCTTCAACTCC |
| β-action-R | GTGATCTCCTTCTGCATCCTGT |

**Reference:**

Li, Z., Qian, W., Zhang, Y., Liao, C., Chen, J., Ding, K., Yu, Q., Jia, Y., He, L., 2024. Enhanced Oncolytic Potential of Engineered Newcastle Disease Virus Lasota Strain through Modification of Its F Protein Cleavage Site. Microorganisms12.
